# Supplementary material for: The effect of molecular configuration and donor on the photophysical properties of 2-phenylfuro[2,3-b]quinoxaline based emitters
Source: Royal Society of Chemistry journal article supplement (doi:10.1039/d3nj05982k), 2024-01-01
Supplement: d3nj05982k1.pdf [file d3nj05982k1.pdf]

# The effect of molecular configuration and donor on the photophysical property of 2-phenylfuro[2,3-*b*]quinoxaline based emitters

MingXin Wu, ChuanMing Wu, BoHua Zhang, MeiTing Luo, Lei Gou\* and Dongdong Wang\*

## Section one: Synthesis of materials

All reagents were used without further purification. The <sup>1</sup>H NMR and <sup>13</sup>C NMR spectra were recorded on Bruker Avance 400 MHz and 600 MHz spectrometers, respectively, and the HRMS experiments were carried out on a Thermo Scientific LTQ Orbitrap Discovery (Bremen, Germany).

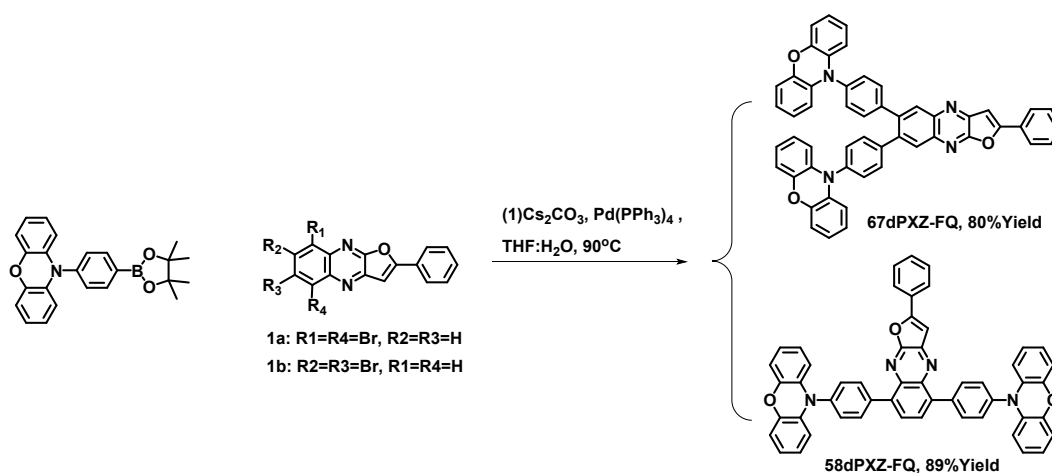

The synthetic routes for two compounds.

### Synthesis of the 67dPXZ-FQ and 58dPXZ-FQ

5,8-dibromo-2-phenylfuro[2,3-*b*]quinoxaline (0.81 g, 2.0 mmol)/ 6,7-dibromo-2-phenylfuro[2,3-*b*]quinoxaline (0.81 g, 2.0 mmol), 10-(4-(4,4,5,5-tetramethyl-1,3,2-dioxaborolan-2-yl)phenyl)-10*H*-phenoxazine (1.85 g, 4.8 mmol), Cs<sub>2</sub>CO<sub>3</sub> (4.17 g, 12.8 mmol) and Pd(PPh<sub>3</sub>)<sub>4</sub> (0.23 g, 0.2 mmol) were added to 100 ml anhydrous toluene. Then the reaction mixture was stirred at 110 °C under a nitrogen atmosphere until TLC revealed complete conversion of the starting material. The mixture was cooled, diluted with H<sub>2</sub>O and filtered. The residue was purified by silica gel column chromatography (CH<sub>2</sub>Cl<sub>2</sub> : petroleum ether=2:1) to give expected product.

**67dPXZ-FQ:** (1.22 g, 80%, Orange solid). <sup>1</sup>H NMR (400 MHz, Chloroform-*d*) δ 8.38 (s, 1H), 8.31 (s,

1H), 8.13-8.06 (m, 3H), 7.66-7.44 (m, 7H), 7.40 (s, 2H), 7.30 (s, 2H), 6.58 (d,  $J=7.8\text{Hz}$ , 12H), 5.90 (s, 4H).  $^{13}\text{C}$  NMR (150MHz, Chloroform- $d$ )  $\delta$  164.9, 155.2, 144.8, 141.4, 141.1(1C), 140.5, 138.4, 132.8, 131.8, 130.7, 129.7, 129.4, 128.3(1C), 126.4, 123.5, 121.5, 115.4, 113.1, 100.7. HRMS(ESI) calcd for  $\text{C}_{52}\text{H}_{32}\text{N}_4\text{O}_3[\text{M}+\text{H}]^+$  761.2547, found 761.2536.

**58dPXZ-FQ:** (1.35g, 89%, Green solid).  $^1\text{H}$  NMR (400 MHz, Chloroform- $d$ )  $\delta$  8.09-8.03 (m, 6H), 7.96 (s, 2H), 7.55-7.50 (m, 7H), 7.39 (s, 1H), 6.75-6.63 (m, 12H), 6.18 (s, 4H);  $^{13}\text{C}$  NMR (150 MHz, Chloroform- $d$ )  $\delta$  164.6, 153.9, 144.1, 140.4, 139.2, 138.8, 136.9, 133.6, 133.4, 131.4, 129.5, 129.3, 129.0, 128.5, 126.3, 113.7, 101.3. HRMS(ESI) calcd for  $\text{C}_{52}\text{H}_{32}\text{N}_4\text{O}_3[\text{M}+\text{H}]^+$  761.2547, found 761.2512.

## Section two: Supplemental Tables and Figures

**Table S1** Photophysical properties of **67dTPA-FQ**.

| Compound         | $\lambda_{\text{abs}}$ | $\lambda_{\text{em}}[\text{nm}]$     | PLQY[%]                              | $t_p$             | $S_1[\text{eV}]$                   | $T_1[\text{eV}]$                   | $\Delta E_{\text{S1T1}}$ | HOMO              | LUMO              |
|------------------|------------------------|--------------------------------------|--------------------------------------|-------------------|------------------------------------|------------------------------------|--------------------------|-------------------|-------------------|
|                  | [nm] <sup>a</sup>      | sol <sup>b</sup> / film <sup>b</sup> | sol <sup>b</sup> / film <sup>b</sup> | [ns] <sup>c</sup> | mea <sup>d</sup> /cal <sup>c</sup> | mea <sup>d</sup> /cal <sup>c</sup> | [eV]                     | [eV] <sup>f</sup> | [eV] <sup>g</sup> |
| <b>67dTPA-FQ</b> | 310,366,431            | 519/552                              | 91/29.2                              | 4.55              | 2.59/2.427                         | 2.19/2.199                         | 0.40/0.228               | -5.90             | -3.33             |

<sup>a</sup> Measured in toluene solution ( $10^{-5}$  M); <sup>b</sup> Measured in vacuum-deposited neat film; <sup>c</sup> Lifetime in toluene solution ( $10^{-5}$  M) excited using nanosecond laser with excited wavelength of 400 nm; <sup>d</sup> Obtained from onset value of high energy edge of fluorescence and phosphorescence spectra of these emitters in toluene solution; <sup>e</sup> Calculated  $S_1$ ,  $T_1$ ,  $T_2$  and  $T_3$  energies in  $\text{CH}_2\text{Cl}_2$  solution using DFT and TD-DFT theory; <sup>f</sup> Calculated from the formula  $\text{LUMO} = -[\text{E}_{\text{RC}} - \text{E}_{(\text{Fc}/\text{Fc}^+)} + 4.8]$  eV; <sup>g</sup> Calculated from the formula  $\text{HOMO} = [\text{LUMO} - \text{Eg}]$  eV.

**Table S2** EL performances of devices based on **67dPXZ-FQ**, **58dPXZ-FQ** as dopant and mCBP as host.

| EML              | $\lambda_{\text{EL}}[\text{nm}]^a$ | $V_{\text{on}}[\text{V}]^b$ | $L_{\text{max}}[\text{cd}\cdot\text{m}^{-2}]$ | EQE[%] <sup>c</sup> | PE $[\text{lm}\cdot\text{W}^{-1}]^c$ | CE $[\text{cd}\cdot\text{A}^{-1}]^c$ |
|------------------|------------------------------------|-----------------------------|-----------------------------------------------|---------------------|--------------------------------------|--------------------------------------|
| <b>67dPXZ-FQ</b> | 504                                | 5                           | 9553                                          | 2.2                 | 4.1                                  | 6.5                                  |
| <b>58dPXZ-FQ</b> | 556                                | 6.5                         | 8681                                          | 2.1                 | 2.9                                  | 6.0                                  |

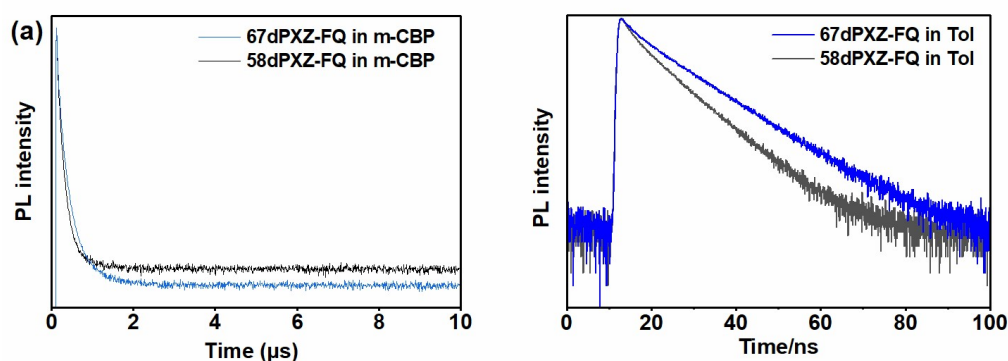

**Figure S1** The transient PL decay curves of two compounds in toluene.

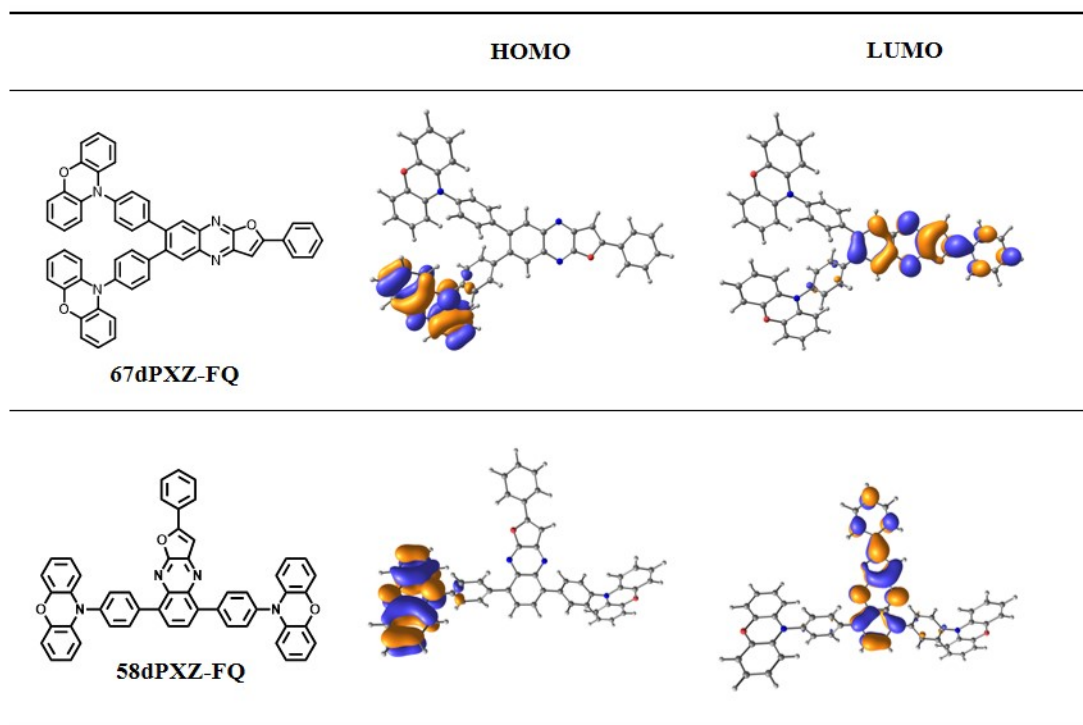

**Figure S2** The electron distribution of HOMO and LUMO orbitals for compounds **67dPXZ-FQ** and **58dPXZ-FQ**.

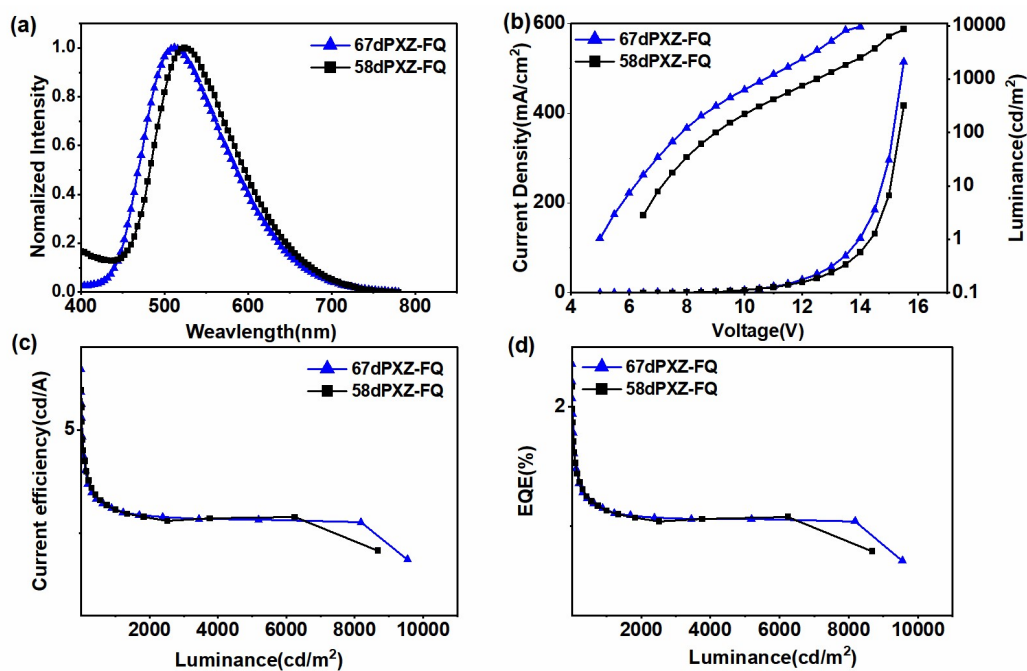

**Figure S3** (a) EL spectra of the devices; (b) the current density–voltage–luminance (J-V-L) curves; (c) the current efficiency and (d) the EQE versus luminance relationships of the device based on mCBP host.

### Section three: Computational details

All calculations were performed using the Gaussian 09 program package. The ground state geometries were optimized via DFT calculations at the PBE0-1/3 and 6-31G\* level in vacuum.

Frequency analysis was used to confirm that the structures are at the global minimum point of the potential surfaces. Based on the optimized ground state, the lowest excited singlet state ( $S_1$ ) and related triplet states ( $T_1$  and  $T_2$ ) configurations are optimized using the TD-DFT method at the PBE0-1/3 and 6-31G\* level. Furthermore, the implicit polarizable continuum model (PCM) is used to consider the solvent effects of toluene. Spin-orbit coupling matrix elements (SOCMEs) are gained using the TD-PBE0/TZVP method with the zero-order regular approximation (ZORA) as implemented in the ORCA4.2.1 program.<sup>1-</sup>

3

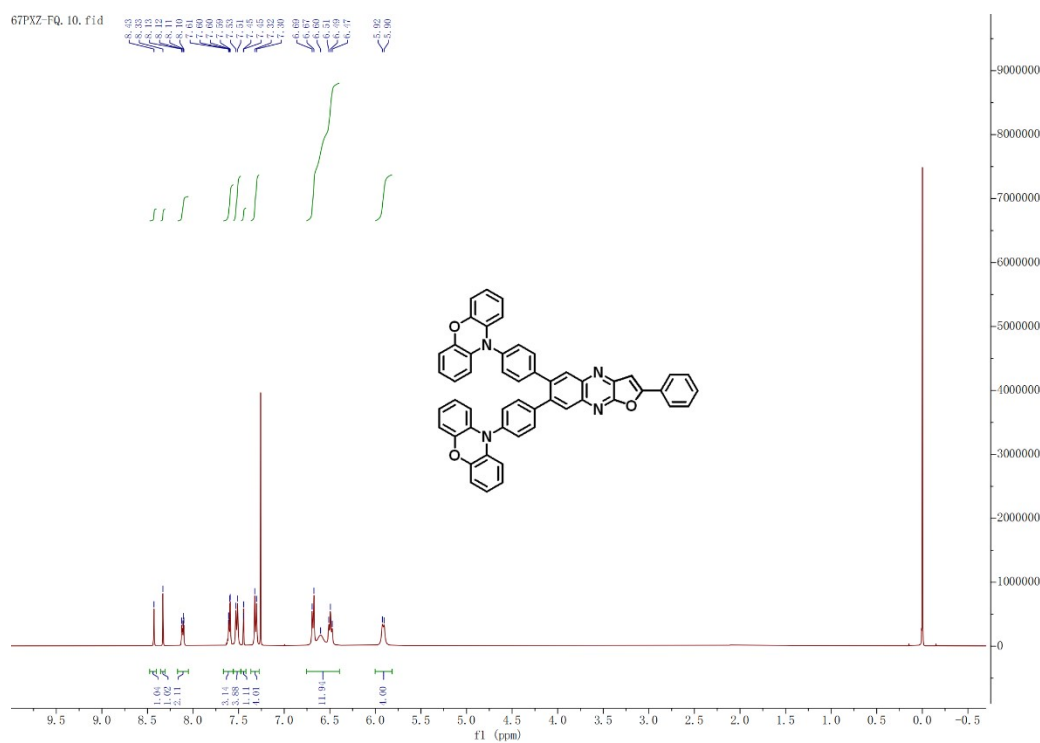



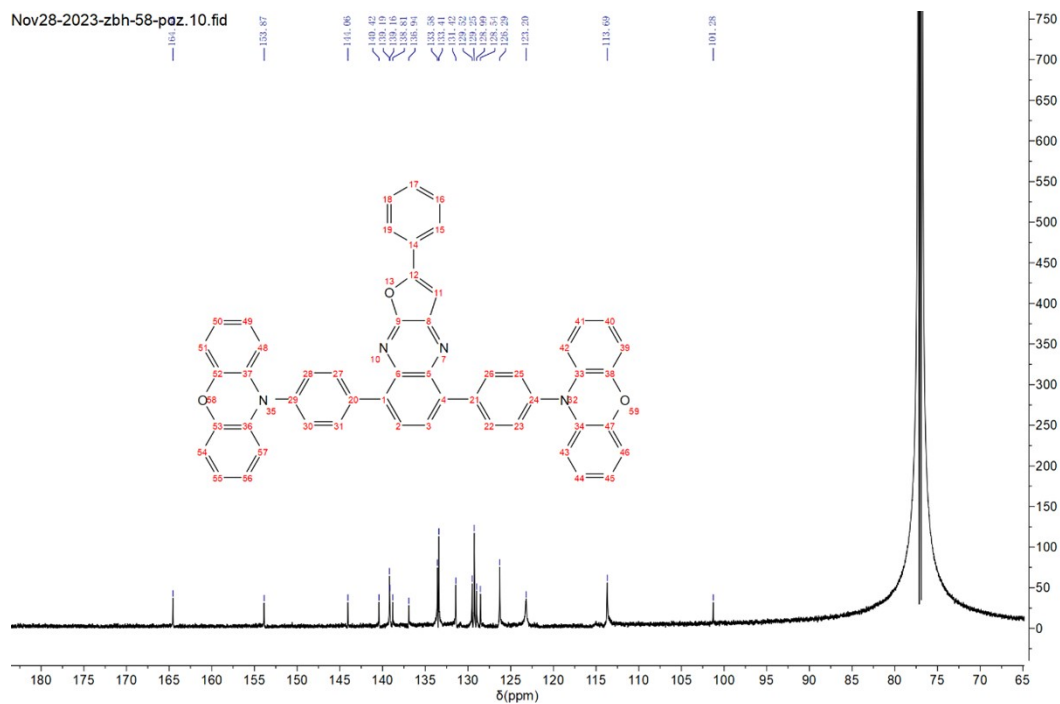

## REFERENCE

- 1 W. Liu, G. Hong, D. Dai, L. Li and M. Dolg, The Beijing four-component density functional program package (BDF) and its application to EuO, EuS, YbO and YbS, *Theor. Chem. Acc.*, 1997 , **96** , 75-83.
- 2 W. Liu, F. Wang and L. Li, The Beijing density functional (BDF) Program package: methodologies and applications, *J. Theor. Comput. Chem.*, 2003 , **2** , 257-272.
- 3 Z. Li, Y. Xiao and W. Liu, On the spin separation of algebraic two-component relativistic hamiltonians, *J. Chem. Phys.*, 2012 , **137** , 154114.
